# Supplementary material for: Influence of the molecular structure on heterocyclic-ring dissociation kinetics and structural evolution of laser-induced plasmas
Source: Royal Society of Chemistry journal article supplement (doi:10.1039/d1ja00166c), 2021-01-01
Supplement: d1ja00166c1.pdf [file d1ja00166c1.pdf]

**Supporting Information**

**Influence of molecular structure on heterocyclic-ring dissociation kinetics and structural evolution of laser-induced plasmas**

G. D. Lai,<sup>a</sup> Y. L. Zhao,<sup>b</sup> S. N. Luo,<sup>c</sup> and J. C. Shi<sup>b,\*</sup>

<sup>a</sup> *School of Physical Science and Technology, Southwest Jiaotong University, Chengdu, Sichuan, People's Republic of China*

<sup>b</sup> *The Peac Institute of Multiscale Sciences, Chengdu, Sichuan, People's Republic of China; E-mail: jcshi@pims.ac.cn*

<sup>c</sup> *School of Materials Science and Engineering, Southwest Jiaotong University, Chengdu, Sichuan, People's Republic of China*

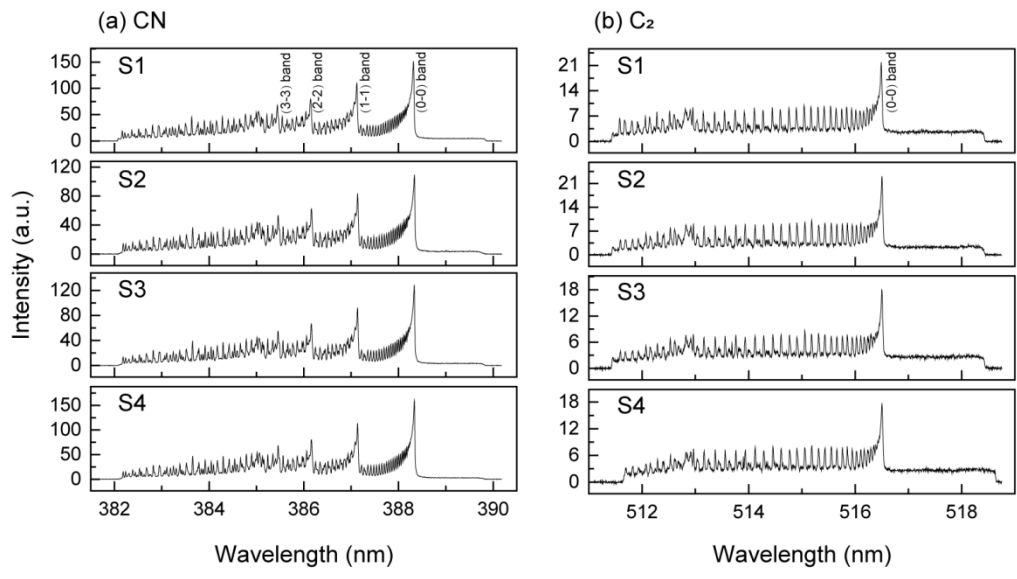

**Fig. 1s.** LIBS spectra of (a) CN violet system ( $B^2\Sigma^+ - X^2\Sigma^+$ ,  $\Delta v = 0$  sequence) and (b) C<sub>2</sub> swan system ( $d^3\Pi_g - a^3\Pi_u$ ,  $\Delta v = 0$  sequence) of laser ablated S1 to S4.

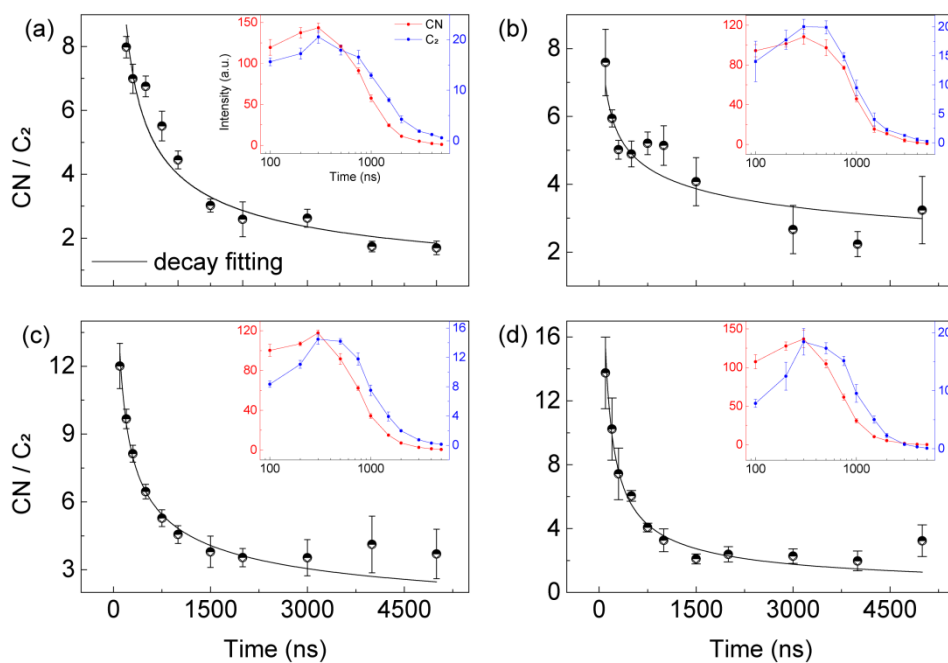

**Fig. 2s.** Intensity ratio  $CN / C_2$  as a function of delay time for (a) S1, (b) S2, (c) S3 and (d) S4. The corresponding  $CN$  and  $C_2$  emission intensities are shown in the insets.
